# Supplementary material
Source: publisher figshare collection journal article supplement (https://acs.figshare.com/ndownloader/files/4451632)
Supplement: Supplementary file 1 [file 4451632]

# A Simple Approach for Preparation of Epoxy Hybrid Nanocomposites Based on Carbon Nanotubes and a Model Clay

*Dazhi Sun, Chien-Chia Chu, and Hung-Jue Sue\**

Polymer Technology Center, Department of Mechanical Engineering,

Texas A&M University, College Station, TX 77843-3123, USA

CORRESPONDING AUTHOR FOOTNOTE:

Prof. H.-J. Sue: E-mail: [hjsue@tamu.edu](mailto:hjsue@tamu.edu)

**Figure S1.**

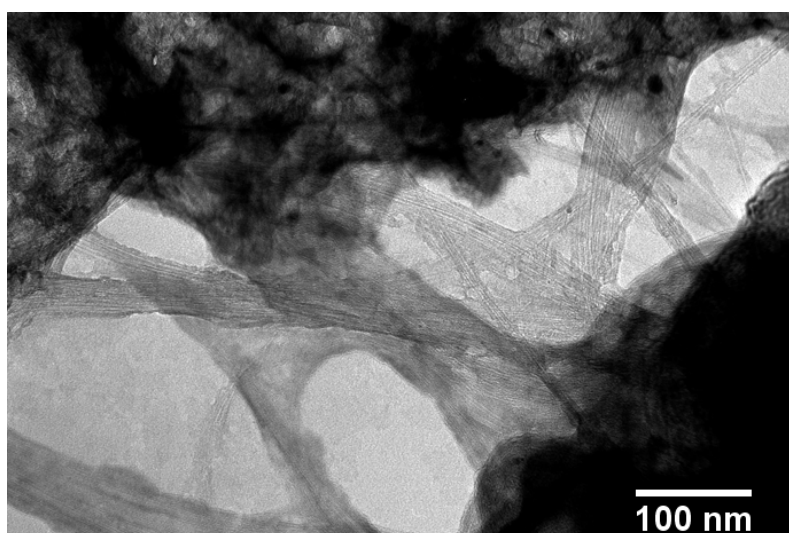

A

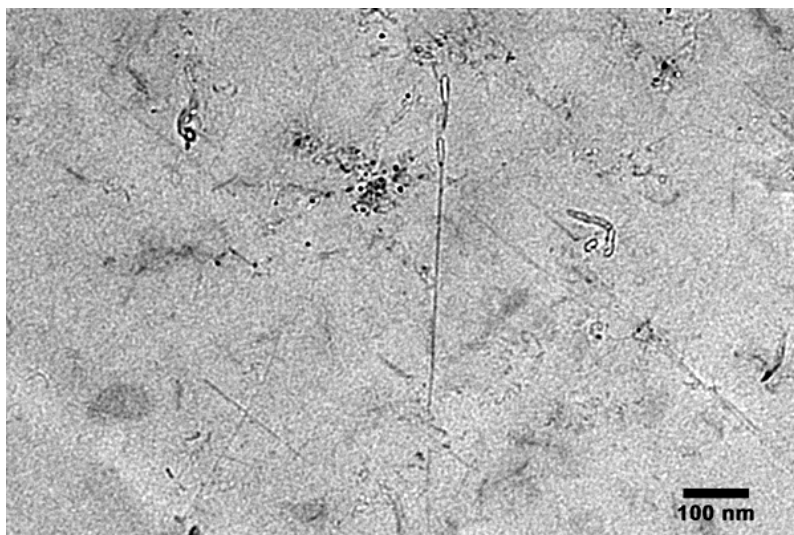

B

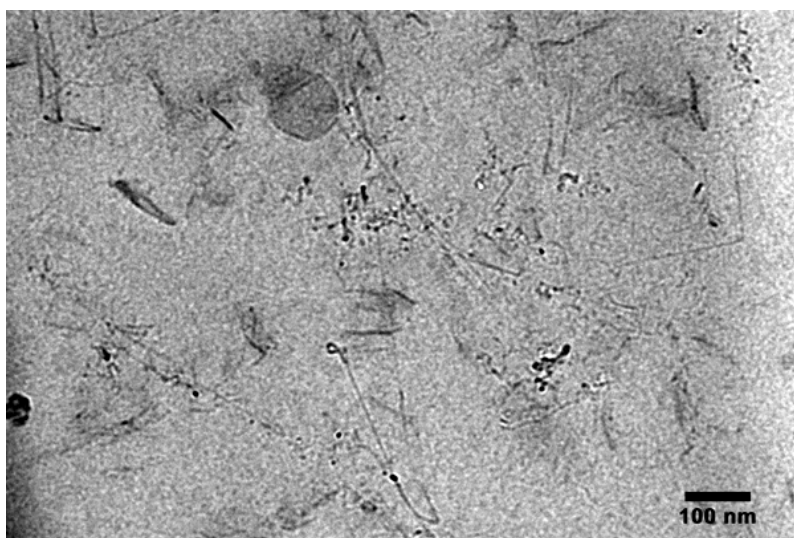

C

Figure S1. TEM images of A) SWNTs before dispersion and epoxy nanocomposites containing B) 0.2 wt.% of SWNTs and 1.0 wt.% of ZrP nanoplatelets and C) 0.4 wt.% of SWNTs and 2.0 wt.% of ZrP nanoplatelets.
